# Supplementary material for: Prognostic Models for Predicting Overall Survival in Patients with Primary Gastric Cancer: A Systematic Review
Source: Hindawi journal article supplement (doi:10.1155/2019/5634598), 2019-09-18
Supplement: f1 [file 5634598.f1.pdf]

## Supplementary file 1. Full list of included studies

All included studies [1-99] (n=99):

Development studies [1-26, 28-43, 45-49, 51, 53-61, 63-65, 67-78, 80, 81, 83, 84, 86-99] (n=90)

Validation studies (independently-external validation studies, and development studies including external validation) [4, 8, 17, 25, 27, 28, 44, 47, 48, 50, 52, 56, 62, 63, 66, 73, 75, 79, 82, 83, 85, 87, 90, 94] (n=24)

1. Liu H, Shen Z, Wang X, *et al.* Increased expression of C-C motif ligand 2 associates with poor prognosis in patients with gastric cancer after gastrectomy. *Tumor Biology* 2016;37(3):3285-3293.
2. Wang W, Chen XL, Zhao SY, *et al.* Prognostic significance of preoperative serum CA125, CA19-9 and CEA in gastric carcinoma. *Oncotarget* 2016;7(23):35423-35436.
3. Rades D, Huttenlocher S, Bartscht T, *et al.* Predicting the survival probability of gastric cancer patients developing metastatic epidural spinal cord compression (MESCC). *Gastric Cancer* 2015;18(4):881-884.
4. Wang X, He H, Zhang H, *et al.* Clinical and prognostic implications of beta1, 6-N-acetylglucosaminyltransferase V in patients with gastric cancer. *Cancer Science* 2012;104(2):185-193.
5. Bria E, De Manzoni G, Beghelli S, *et al.* A clinical-biological risk stratification

model for resected gastric cancer: Prognostic impact of HER2, FHIT, and APC

expression status. *Annals of Oncology* 2013;24(3):693-701.

6. Zhu X, Zhao X, Peng W, *et al.* Epirubicin combined with oxaliplatin and 5-day continuous infusion of 5-fluorouracil as a first-line treatment for metastatic gastric cancer: treatment outcomes and analysis of prognostic factors. *Journal of Cancer Research and Clinical Oncology* 2015;141(1):109-118.

7. Mohri Y, Tanaka K, Ohi M, *et al.* Prognostic significance of host- and tumor-related factors in patients with gastric cancer. *World Journal of Surgery* 2010;34(2):285-90.

8. Woo Y, Son T, Song K, *et al.* A novel prediction model of prognosis after gastrectomy for gastric carcinoma. *Annals of Surgery* 2016;264(1):114-120.

9. Victorzon M, Lundin J, Haglund C, *et al.* A risk score for predicting outcome in patients with gastric cancer, based on stage, sialyl-Tn immunoreactivity and ploidy - A multivariate analysis. *International Journal of Cancer* 1996;67(2):190-193.

10. Costa ML, de Cassia Braga Ribeiro K, Machado MA, *et al.* Prognostic score in gastric cancer: the importance of a conjoint analysis of clinical, pathologic, and therapeutic factors. *Annals of Surgical Oncology* 2006;13(6):843-50.

11. Haga Y, Ikejiri K, Wada Y, *et al.* Preliminary study of surgical audit for overall survival following gastric cancer resection. *Gastric Cancer* 2015;18(1):138-146.

12. Catalano V, Graziano F, Santini D, *et al.* Second-line chemotherapy for patients with advanced gastric cancer: Who may benefit? *British Journal of Cancer* 2008;99(9):1402-1407.
13. Park HS, Rha SY, Kim HS, *et al.* A prognostic model to predict clinical outcome in gastric cancer patients with bone metastasis. *Oncology* 2011;80(1-2):142-150.
14. Wang Q, Yang Y, Zhang YP, *et al.* Prognostic value of carbohydrate tumor markers and inflammation-based markers in metastatic or recurrent gastric cancer. *Medical oncology (Northwood, London, England)* 2014;31(12):289.
15. Kanagavel D, Pokataev IA, Fedyanin MY, *et al.* A prognostic model in patients treated for metastatic gastric cancer with second-line chemotherapy. *Annals of Oncology* 2010;21(9):1779-1785.
16. Wang X, Zhang H, He H, *et al.* Prognostic value of stromal cell-derived factor 1 expression in patients with gastric cancer after surgical resection. *Cancer Science* 2014;105(11):1447-56.
17. Han DS, Suh YS, Kong SH, *et al.* Nomogram predicting long-term survival after D2 gastrectomy for gastric cancer. *Journal of Clinical Oncology* 2012;30(31):3834-3840.
18. Song BI, Kim HW, Won KS, *et al.* Preoperative standardized uptake value of metastatic lymph nodes measured by 18F-FDG PET/CT improves the prediction of

prognosis in gastric cancer. *Medicine* 2015;94(26):e1037.

19. Xu ZY, Chen JS, Shu YQ. Gene expression profile towards the prediction of patient survival of gastric cancer. *Biomedicine and Pharmacotherapy* 2010;64(2):133-139.

20. Zhang H, Wang X, Shen Z, *et al.* Infiltration of diametrically polarized macrophages predicts overall survival of patients with gastric cancer after surgical resection. *Gastric Cancer* 2015;18(4):740-750.

21. Wang Z, Liu H, Shen Z, *et al.* The prognostic value of CXC-chemokine receptor 2 (CXCR2) in gastric cancer patients. *BMC Cancer* 2015;15(1):766.

22. Mohammadzadeh F, Noorkojuri H, Pourhoseingholi MA, *et al.* Predicting the probability of mortality of gastric cancer patients using decision tree. *Irish Journal of Medical Science* 2015;184(2):277-84.

23. Min L, Ruan Y, Shen Z, *et al.* Overexpression of Ras-GTPase-activating protein SH3 domain-binding protein 1 correlates with poor prognosis in gastric cancer patients. *Histopathology* 2015;67(5):677-688.

24. Koo DH, Ryoo BY, Kim HJ, *et al.* A prognostic model in patients who receive chemotherapy for metastatic or recurrent gastric cancer: validation and comparison with previous models. *Cancer Chemotherapy and Pharmacology* 2011;68(4):913-921.

25. Zhang H, Wang X, Xu J, *et al.* Notch1 activation is a poor prognostic factor in

patients with gastric cancer. *British Journal of Cancer* 2014;110(9):2283-2290.

26. Liu K, Yang K, Wu B, *et al.* Tumor-infiltrating immune cells are associated with prognosis of gastric cancer. *Medicine* 2015;94(39):e1631.

27. Reim D, Novotny A, Eom BW, *et al.* External validation of an Eastern Asian nomogram for survival prediction after gastric cancer surgery in a European patient cohort. *Medicine* 2015;94(52):e2406.

28. Eom BW, Ryu KW, Nam BH, *et al.* Survival nomogram for curatively resected Korean gastric cancer patients: Multicenter retrospective analysis with external validation. *PLoS ONE* 2015;10(2):e0119671.

29. Qian J, Qian Y, Wang J, *et al.* A clinical prognostic scoring system for resectable gastric cancer to predict survival and benefit from paclitaxel- or oxaliplatin-based adjuvant chemotherapy. *Drug Design, Development and Therapy* 2016;10:241-258.

30. Qu JL, Qu XJ, Li Z, *et al.* Prognostic model based on systemic inflammatory response and clinicopathological factors to predict outcome of patients with node-negative gastric cancer. *PLoS ONE* 2015;10(6):e0128540.

31. Xu YQ, Jiang TW, Cui YH, *et al.* Prognostic value of ABO blood group in patients with gastric cancer. *Journal of Surgical Research* 2016;201(1):188-195.

32. Kim JG, Ryoo BY, Park YH, *et al.* Prognostic factors for survival of patients with advanced gastric cancer treated with cisplatin-based chemotherapy. *Cancer*

Chemotherapy and Pharmacology 2008;61(2):301-307.

33. Kologlu M, Kama NA, Reis E, *et al.* A prognostic score for gastric cancer.

American Journal of Surgery 2000;179(6):521-526.

34. Du C, Zhou Y, Huang K, *et al.* Defining a high-risk subgroup of pathological T2N0

gastric cancer by prognostic risk stratification for adjuvant therapy. Journal of

Gastrointestinal Surgery 2011;15(12):2153-2158.

35. Becker K, Reim D, Novotny A, *et al.* Proposal for a multifactorial prognostic score

that accurately classifies 3 groups of gastric carcinoma patients with different

outcomes after neoadjuvant chemotherapy and surgery. Annals of Surgery

2012;256(6):1002-1007.

36. Lee J, Lim T, Uhm JE, *et al.* Prognostic model to predict survival following

first-line chemotherapy in patients with metastatic gastric adenocarcinoma. Annals

of Oncology 2007;18(5):886-891.

37. Wang J, Qu J, Li Z, *et al.* A prognostic model in metastatic or recurrent gastric

cancer patients with good performance status who received first-line chemotherapy.

Translational Oncology 2016;9(3):256-261.

38. Lei KF, Liu BY, Zhang XQ, *et al.* Development of a survival prediction model for

gastric cancer using serine proteases and their inhibitors. Experimental and

Therapeutic Medicine 2012;3(1):109-116.

39. Kadowaki S, Komori A, Narita Y, *et al.* Long-term outcomes and prognostic factors of patients with advanced gastric cancer treated with S-1 plus cisplatin combination chemotherapy as a first-line treatment. *International Journal of Clinical Oncology* 2014;19(4):656-661.
40. Hirabayashi S, Kosugi S, Isobe Y, *et al.* Development and external validation of a nomogram for overall survival after curative resection in serosa-negative, locally advanced gastric cancer. *Annals of Oncology* 2014;25(6):1179-84.
41. Takahari D, Boku N, Mizusawa J, *et al.* Determination of prognostic factors in Japanese patients with advanced gastric cancer using the data from a randomized controlled trial, Japan clinical oncology group 9912. *The oncologist* 2014;19(4):358-366.
42. Liu H, Zhang H, Shen Z, *et al.* Expression of Jagged1 predicts postoperative clinical outcome of patients with gastric cancer. *International Journal of Clinical and Experimental Medicine* 2015;8(9):14782-14792.
43. Song KY, Park YG, Jeon HM, *et al.* A nomogram for predicting individual survival of patients with gastric cancer who underwent radical surgery with extended lymph node dissection. *Gastric Cancer* 2014;17(2):287-293.
44. Mariani L, Miceli R, Lusa L, *et al.* A modified prognostic score for patients with curatively resected gastric cancer. *Tumori* 2005;91(3):221-226.

45. Wang ZX, Yang XL, He MM, *et al.* The Efficacy of adjuvant FOLFOX6 for patients with gastric cancer after D2 lymphadenectomy a propensity score-matched analysis. *Medicine (United States)* 2016;95(16):e3214.
46. Liu H, Zhang H, Shen Z, *et al.* Increased expression of CSF-1 associates with poor prognosis of patients with gastric cancer undergoing gastrectomy. *Medicine (United States)* 2016;95(9):e2675.
47. Marubini E, Bonfanti G, Bozzetti F, *et al.* A prognostic score for patients resected for gastric cancer. *European Journal of Cancer Part A: General Topics* 1993;29(6):845-850.
48. Wang Z, Chen G, Wang Q, *et al.* Identification and validation of a prognostic 9-genes expression signature for gastric cancer. *Oncotarget* 2017;8(43):73826-73836.
49. Wang P, Wang Y, Hang B, *et al.* A novel gene expression-based prognostic scoring system to predict survival in gastric cancer. *Oncotarget* 2016;7(34):55343-55351.
50. Akgul O, Ocak S, Gundogdu SB, *et al.* Comparison of East and West survival nomograms in Turkish gastric cancer patients who underwent radical surgery. *Scand J Surg* 2018; 10.1177/1457496918766724:1457496918766724.
51. Bauer L, Hapfelmeier A, Blank S, *et al.* A novel pretherapeutic gene expression-based risk score for treatment guidance in gastric cancer. *Ann Oncol* 2018;29(1):127-132.

52. Bencivenga M, Verlatto G, Han DS, *et al.* Validation of two prognostic models for recurrence and survival after radical gastrectomy for gastric cancer. *Br J Surg* 2017;104(9):1235-1243.
53. Cao Y, Liu H, Zhang H, *et al.* CXC chemokine receptor 1 predicts postoperative prognosis and chemotherapeutic benefits for TNM II and III resectable gastric cancer patients. *Oncotarget* 2017;8(12):20328-20339.
54. Cao Y, Zhang H, Liu H, *et al.* Glycoprotein 130 is associated with adverse postoperative clinical outcomes of patients with late-stage non-metastatic gastric cancer. *Sci Rep* 2016;6:38364.
55. Chen H, Li H, Zhao J, *et al.* High intratumoral expression of tetranectin associates with poor prognosis of patients with gastric cancer after gastrectomy. *J Cancer* 2017;8(17):3623-3630.
56. Chen S, Rao H, Liu J, *et al.* Lymph nodes ratio based nomogram predicts survival of resectable gastric cancer regardless of the number of examined lymph nodes. *Oncotarget* 2017;8(28):45585-45596.
57. Choi JH, Suh YS, Choi Y, *et al.* Comprehensive Analysis of the Neutrophil-to-Lymphocyte Ratio for Preoperative Prognostic Prediction Nomogram in Gastric Cancer. *World J Surg* 2018; 10.1007/s00268-018-4510-4.
58. De B, Rhome R, Jairam V, *et al.* Gastric adenocarcinoma in young adult patients:

patterns of care and survival in the United States. *Gastric Cancer* 2018;

10.1007/s10120-018-0826-x.

59. Deng X, Xiao Q, Liu F, *et al.* A gene expression-based risk model reveals prognosis of gastric cancer. *PeerJ* 2018;6:e4204.

60. Fuchs CS, Muro K, Tomasek J, *et al.* Prognostic factor analysis of overall survival in gastric cancer from two phase III studies of second-line Ramucirumab (REGARD and RAINBOW) using pooled patient data. *J Gastric Cancer* 2017;17(2):132-144.

61. Goshayeshi L, Hoseini B, Yousefli Z, *et al.* Predictive model for survival in patients with gastric cancer. *Electron Physician* 2017;9(12):6035-6042.

62. Haga Y, Hato S, Ikenaga M, *et al.* Validation of an assessment tool: estimation of postoperative overall survival for gastric cancer. *Eur J Surg Oncol* 2018;44(4):515-523.

63. Hou JY, Wang YG, Ma SJ, *et al.* Identification of a prognostic 5-Gene expression signature for gastric cancer. *J Cancer Res Clin Oncol* 2017;143(4):619-629.

64. Hung YS, Chang SC, Liu KH, *et al.* A prognostic model based on lymph node metastatic ratio for predicting survival outcome in gastric cancer patients with N3b subclassification. *Asian J Surg* 2017; 10.1016/j.asjsur.2017.10.001.

65. Jiang Y, Zhang Q, Hu Y, *et al.* ImmunoScore signature: a prognostic and predictive tool in gastric cancer. *Ann Surg* 2018;267(3):504-513.

66. Kim PS, Lee KM, Han DS, *et al.* External validation of a gastric cancer nomogram

derived from a large-volume center using dataset from a medium-volume center. J

Gastric Cancer 2017;17(3):204-211.

67. Kim SY, Yoon MJ, Park YI, *et al.* Nomograms predicting survival of patients with unresectable or metastatic gastric cancer who receive combination cytotoxic chemotherapy as first-line treatment. Gastric Cancer 2018;21(3):453-463.

68. Korhani Kangi A, Bahrampour A. Predicting the survival of gastric cancer patients using artificial and Bayesian neural networks. Asian Pac J Cancer Prev 2018;19(2):487-490.

69. Lin C, Liu H, Zhang H, *et al.* Tryptase expression as a prognostic marker in patients with resected gastric cancer. Br J Surg 2017;104(8):1037-1044.

70. Lin C, Liu H, Zhang H, *et al.* Interleukin-13 receptor alpha2 is associated with poor prognosis in patients with gastric cancer after gastrectomy. Oncotarget 2016;7(31):49281-49288.

71. Liu H, Lin C, Shen Z, *et al.* Decreased expression of granulocyte-macrophage colony-stimulating factor is associated with adverse clinical outcome in patients with gastric cancer undergoing gastrectomy. Oncol Lett 2017;14(4):4701-4707.

72. Miao Y, Sui J, Xu SY, *et al.* Comprehensive analysis of a novel four-lncRNA signature as a prognostic biomarker for human gastric cancer. Oncotarget 2017;8(43):75007-75024.

73. Narita Y, Kadowaki S, Oze I, *et al.* Establishment and validation of prognostic nomograms in first-line metastatic gastric cancer patients. *J Gastrointest Oncol* 2017;9(1):52-63.
74. Peng P, Min L, Song S, *et al.* Elevated expression of Calpain-4 predicts poor prognosis in patients with gastric cancer after gastrectomy. *Int J Mol Sci* 2016;17(10).
75. Peng PL, Zhou XY, Yi GD, *et al.* Identification of a novel gene pairs signature in the prognosis of gastric cancer. *Cancer Med* 2018;7(2):344-350.
76. Qu J, Qu X, Li Z, *et al.* Role of patient-, tumor- and systemic inflammatory response-related factors in predicting survival of patients with node-negative gastric cancer. *Tumour Biol* 2017;39(6):1010428317698374.
77. Song J, Yin J, Bai Z, *et al.* The profile of serum microRNAs predicts prognosis for resected gastric cancer patients receiving platinum-based chemotherapy. *Dig Dis Sci* 2017;62(5):1223-1234.
78. Sun H, He B, Nie Z, *et al.* A nomogram based on serum bilirubin and albumin levels predicts survival in gastric cancer patients. *Oncotarget* 2017;8(25):41305-41318.
79. Takahari D, Mizusawa J, Koizumi W, *et al.* Validation of the JCOG prognostic index in advanced gastric cancer using individual patient data from the SPIRITS and G-SOX trials. *Gastric Cancer* 2017;20(5):757-763.

80. Wang C, Zhou Y, Chen B, *et al.* Prognostic value of tripartite motif containing 29 expression in patients with gastric cancer following surgical resection. *Oncol Lett* 2018;15(4):5792-5798.
81. Wang PL, Xiao FT, Gong BC, *et al.* A nomogram for predicting overall survival of gastric cancer patients with insufficient lymph nodes examined. *J Gastrointest Surg* 2017;21(6):947-956.
82. Wang ZX, Li GX, Zhou ZW, *et al.* Validation of a nomogram for selecting patients for chemotherapy after D2 gastrectomy for cancer. *Br J Surg* 2017;104(9):1226-1234.
83. Wang ZX, Qiu MZ, Jiang YM, *et al.* Comparison of prognostic nomograms based on different nodal staging systems in patients with resected gastric cancer. *J Cancer* 2017;8(6):950-958.
84. Wen T, Wang Z, Li Y, *et al.* A four-factor immunoscore system that predicts clinical outcome for stage II/III gastric cancer. *Cancer Immunol Res* 2017;5(7):524-534.
85. Woo Y, Goldner B, Son T, *et al.* Western validation of a novel gastric cancer prognosis prediction model in US gastric cancer patients. *J Am Coll Surg* 2018;226(3):252-258.
86. Wu S, Liu H, Zhang H, *et al.* Galectin-8 is associated with recurrence and survival of patients with non-metastatic gastric cancer after surgery. *Tumour Biol*

2016;37(9):12635-12642.

87. Yang J, Bo L, Han T, *et al.* Pathway- and clinical-factor-based risk model predicts the prognosis of patients with gastric cancer. *Mol Med Rep* 2018;17(5):6345-6356.

88. Yuan SQ, Wu WJ, Qiu MZ, *et al.* Development and validation of a nomogram to predict the benefit of adjuvant radiotherapy for patients with resected gastric cancer. *J Cancer* 2017;8(17):3498-3505.

89. Zeng D, Zhou R, Yu Y, *et al.* Gene expression profiles for a prognostic immunoscore in gastric cancer. *Br J Surg* 2018; 10.1002/bjs.10871.

90. Zhang H, Liu H, Shen Z, *et al.* Tumor-infiltrating neutrophils is prognostic and predictive for postoperative adjuvant chemotherapy benefit in patients with gastric cancer. *Ann Surg* 2018;267(2):311-318.

91. Zhang J, Li SQ, Liao ZH, *et al.* Prognostic value of a novel FPR biomarker in patients with surgical stage II and III gastric cancer. *Oncotarget* 2017;8(43):75195-75205.

92. Zhao LY, Chen XL, Wang YG, *et al.* A new predictive model combined of tumor size, lymph nodes count and lymphovascular invasion for survival prognosis in patients with lymph node-negative gastric cancer. *Oncotarget* 2016;7(44):72300-72310.

93. Zheng ZF, Lu J, Zheng CH, *et al.* A novel prognostic scoring system based on

preoperative sarcopenia predicts the long-term outcome for patients after R0 resection for gastric cancer: experiences of a high-volume center. *Ann Surg Oncol* 2017;24(7):1795-1803.

94. Zhong Q, Chen QY, Li P, *et al.* Prediction of conditional probability of survival after surgery for gastric cancer: a study based on Eastern and Western large data sets. *Surgery* 2018; 10.1016/j.surg.2018.02.011.

95. Zhou YX, Yang LP, Wang ZX, *et al.* Lymph node staging systems in patients with gastric cancer treated with D2 resection plus adjuvant chemotherapy. *J Cancer* 2018;9(4):660-666.

96. Oh SE, Seo SW, Choi MG, *et al.* Prediction of overall survival and novel classification of patients with gastric cancer using the survival recurrent network. *Ann Surg Oncol* 2018;25(5):1153-1159.

97. Coimbra FJF, da Costa WL, Ribeiro HSC, *et al.* Noncurative resection for gastric cancer patients: who could benefit?: Determining prognostic factors for patient selection. *Annals of Surgical Oncology* 2016;23(4):1212-1219.

98. Hsieh MC, Wang SH, Chuah SK, *et al.* A prognostic model using inflammation-and nutrition-based scores in patients with metastatic gastric adenocarcinoma treated with chemotherapy. *Medicine (United States)* 2016;95(17):e3504.

99. Liu J, Geng Q, Chen S, *et al.* Nomogram based on systemic inflammatory response markers predicting the survival of patients with resectable gastric cancer after D2 gastrectomy. *Oncotarget* 2016;7(25):37556-37565.

### Supplementary file 2. Model presentation and included final predictors

| Model # | Reference #* | Study ID            | Model presentation         | Included final predictors                                                                                                 |
|---------|--------------|---------------------|----------------------------|---------------------------------------------------------------------------------------------------------------------------|
| 1       | 1            | Liu Hao 2016(1)     | Nomogram                   | T, N, M, CCL2 expression                                                                                                  |
| 2       | 2            | Wang Wei 2016       | Nomogram                   | Age, tumor size, TNM, NPTM                                                                                                |
| 3       | 2            | Wang Wei 2016       | Nomogram                   | Tumor size, TNM, NPTM, macroscopic type                                                                                   |
| 4       | 3            | Rades Dirk 2015     | Unweighted score           | Visceral metastasis, rapidity of developing weakness of legs                                                              |
| 5       | 4            | Wang Xuefei 2012    | No information             | TNM, MGAT5 expression                                                                                                     |
| 6       | 4            | Wang Xuefei 2012    | No information             | Kiel stage, MGAT5 expression                                                                                              |
| 7       | 5            | Bria E 2013         | HR-weighted score          | Sex, age, TNM, resection margin, tumor site, resected LN, Her2, APC                                                       |
| 8       | 6            | Zhu Xiaodong 2015   | Unweighted score           | liver metastasis, lung metastasis, CA199, ascite*pleural effusion                                                         |
| 9       | 7            | Mohri Yasuhiko 2010 | Coefficient-weighted score | NLR, tumor size, T                                                                                                        |
| 10      | 8            | Woo Yanghee 2016    | Equation                   | Age, T, M, number of retrieved LN, number of positive LN, resection type(total/subtotal), sex, histology(differentiation) |
| 11      | 9            | Victorzon M 1996    | Coefficient-weighted score | TNM, STn, DNA ploidy                                                                                                      |

|    |    |                                   |                                                           |                                                                                                      |
|----|----|-----------------------------------|-----------------------------------------------------------|------------------------------------------------------------------------------------------------------|
| 12 | 10 | Costa Marcelo<br>Leite Viera 2006 | Coefficient-weighted<br>score                             | Sex, weight loss, TNM, lymphocyte count, LNR, lymphadenectomy(D)                                     |
| 13 | 11 | Haga Yoshio 2015                  | Equation                                                  | T, N, circumferential involvement, age, ASA physical status, serum sodium                            |
| 14 | 12 | Catalano V 2008                   | Unweighted score                                          | ECOG performance status, Hb, CEA, the number of metastasis, TTP after chemotherapy                   |
| 15 | 13 | Park Hyung Soon<br>2011           | Unweighted score                                          | ECOG performance status, multiple bone metastasis, CEA                                               |
| 16 | 14 | Wang Qing<br>2014                 | Unweighted score                                          | CEA, CA125, mGPS                                                                                     |
| 17 | 15 | Kanagavel D 2010                  | HR-weighted score                                         | ECOG performance score, Hb, TTP under chemotherapy                                                   |
| 18 | 16 | Wang Xuefei<br>2014               | Nomogram                                                  | T, N, M, SDF-1expression                                                                             |
| 19 | 17 | Han Dongseok<br>2012              | Nomogram                                                  | Age, sex, tumor site, depth of invasion, number of metastatic LN, number of examined LN(square root) |
| 20 | 18 | Song Bongil 2015                  | No information                                            | T, N, nodal SUVmax                                                                                   |
| 21 | 19 | Xu Zhenyue 2010                   | Equation (Weights<br>based on z score<br>from univariate) | ITGB1, PDGFB, THBS1, TWIST1                                                                          |
| 22 | 20 | Zhang Heng<br>2015                | Nomogram                                                  | T, N, M, CD11c, CD206                                                                                |
| 23 | 21 | Wang Zhenglin<br>2015             | Nomogram                                                  | T, N, M, CXCR2 expression                                                                            |

|    |    |                      |                               |                                                                                                                                          |
|----|----|----------------------|-------------------------------|------------------------------------------------------------------------------------------------------------------------------------------|
| 24 | 22 | Mohammadzadeh F 2015 | Decision tree (with 16 rules) | Diabetes, surgery, tumor size, age, pathologic stage, ethnicity, exposure to chemical exposure, alcohol, tobacco                         |
| 25 | 23 | Min Lingqiang 2015   | No information                | T, TNM, G3BP1 expression                                                                                                                 |
| 26 | 24 | Koo Dong Hoe 2011    | HR-weighted score             | M, NLR                                                                                                                                   |
| 27 | 25 | Zhang H 2014         | Score                         | TNM, ICN1 expression                                                                                                                     |
| 28 | 26 | Liu Kai 2015         | Nomogram                      | Tumor site, tumor size, N, resection type(total/subtotal),TFoxp3+ cells, TCD68+/SCD68+ ratio, TCD66b+/SCD66b+ ratio, TCD8+/TFoxp3+ ratio |
| 29 | 28 | Eom Bang Wool 2015   | Nomogram                      | Age, lymphadenectomy, tumor site, lymphovascular invasion, tumor size, depth of invasion, metastasis LN                                  |
| 30 | 29 | Qian Jing 2016       | HR-weighted score             | LNR, lymphovascular invasion, TNM, CEA, Hb                                                                                               |
| 31 | 30 | Qu Jinglei 2015      | HR-weighted score             | Age, tumor size, Lauren type, T, number of positive LN, NLR                                                                              |
| 32 | 31 | Xu Yeqiong 2016      | Nomogram                      | Age, grade, T, N, chemotherapy, ABO blood type, CA724                                                                                    |
| 33 | 32 | Kim Jong Gwang 2008  | Coefficient-weighted score    | ECOG performance score, bilirubin, peritoneal metastasis, bone metastasis, number of metastasis sites                                    |
| 34 | 33 | Kologlu Murat 2000   | Coefficient-weighted score    | T, N, M, LNR, resection margin, tumor site, lymphadenectomy, Lauren type, Borrmann type                                                  |
| 35 | 34 | Du Chunyan 2011      | Coefficient-weighted score    | Tumor size, lymphatic and/or blood vascular invasion, perineural invasion                                                                |
| 36 | 35 | Becker Karen 2012    | Unweighted score              | T, N, tumor regression                                                                                                                   |

|    |    |                         |                            |                                                                                                                                                                 |
|----|----|-------------------------|----------------------------|-----------------------------------------------------------------------------------------------------------------------------------------------------------------|
| 37 | 36 | Lee J 2007              | Unweighted score           | ECOG performance score, bone metastasis, ascite, ALP, albumin, previous gastrectomy                                                                             |
| 38 | 37 | Wang Jin 2016           | HR-weighted score          | Liver metastasis, bone metastasis, NLR, number of metastasis sites, previous gastrectomy                                                                        |
| 39 | 38 | Lei Ke Feng 2012        | Equation                   | SERPINB5, KLK10, KLK11, TNM                                                                                                                                     |
| 40 | 39 | Kadowaki Shigenori 2014 | Unweighted score           | ECOG performance score, multiple metastasis sites, ALP                                                                                                          |
| 41 | 40 | Hirabayashi S 2014      | Nomogram                   | Age, sex, tumor size, tumor site, macroscopic type, histological type, depth of invasion, number of positive LN, number of examined LN, lymphovascular invasion |
| 42 | 41 | Takahari Daisuke 2014   | Unweighted score           | ECOG performance score, ALP, number of metastasis sites, previous gastrectomy                                                                                   |
| 43 | 42 | Liu Hao 2015            | Nomogram                   | T, N, M, Jagged1 expression                                                                                                                                     |
| 44 | 43 | Song Kyo Young 2014     | Nomogram                   | Age, sex, tumor size, T, N, Borrmann type, Lauren type                                                                                                          |
| 45 | 45 | Wang Zixian 2016        | Nomogram                   | Tumor size, T, N, FOLFOX6*THN                                                                                                                                   |
| 46 | 46 | Liu Hao 2016(2)         | Nomogram                   | T, N, CSF1 expression                                                                                                                                           |
| 47 | 47 | Marubini E 1993         | Coefficient-weighted score | Age, T, N, tumor site                                                                                                                                           |
| 48 | 48 | Wang Zhiqiang 2017      | Unweighted score           | NR1I2, CST2, LAMP5, MMP7, LGALS1, CES1P1, COL8A1, FOXS1, C10RF198                                                                                               |
| 49 | 49 | Wang Pin 2016           | Coefficient-weighted       | 53 genes                                                                                                                                                        |

|    |    |                       | score                 |                                                                                                                                          |
|----|----|-----------------------|-----------------------|------------------------------------------------------------------------------------------------------------------------------------------|
| 50 | 51 | Bauer L 2018          | Equation              | T, site, Lauren type, CCL5, CTNNB1, EXOSC3, LZTR1                                                                                        |
| 51 | 53 | Cao Yifan 2017        | Nomogram              | TNM, CXCR1                                                                                                                               |
| 52 | 54 | Cao Yifan 2016        | Nomogram              | TNM, gp130                                                                                                                               |
| 53 | 55 | Chen Hao 2017         | Nomogram              | Lauren type, N, metastasis, tetranectin                                                                                                  |
| 54 | 56 | Chen Shangxiang 2017  | Nomogram              | Age, site, pathological type, T, TLN,mLNR                                                                                                |
| 55 | 57 | Choi Jongho 2018      | Equation,<br>Nomogram | NLR, age:NLR, sex, size, T, N                                                                                                            |
| 56 | 58 | De Brian 2018         | Nomogram              | TNM, treatment, grade, race, comorbidity score, sex                                                                                      |
| 57 | 59 | Deng Xiaorong 2017    | Nomogram              | Gene risk score, age, sex, size, grade, radiation                                                                                        |
| 58 | 60 | Fuchs Charles S 2017  | Equation              | Primary tumor, differentiation, time to progression, ECOG, peritoneal metastasis, ALP, lymphocyte, LDH, albumin, AST, neutrophil, sodium |
| 59 | 61 | Goshayeshi Laden 2017 | Equation              | Sex, birth year, age at diagnosis, family history, other GI cancer, age at diagnosis of family gastric cancer                            |
| 60 | 63 | Hou Junyi 2016        | Unweighted score      | TRPC1, SGCE, TNFRSF11A, LRRN1, HLF, CYS1, PPP1R14A, NOV, NBEA, CES1, RGN                                                                 |
| 61 | 64 | Hung Yushin 2017      | Unweighted score      | T, LNR, CEA, ECOG performance score, adjuvant chemotherapy                                                                               |
| 62 | 65 | Jiang Yuming 2018     | Nomogram              | IS, differentiation, CA199, CEA, T,N                                                                                                     |
| 63 | 65 | Jiang Yuming          | Nomogram              | IS, differentiation, CA199, CEA, T,N                                                                                                     |

| 2018 |    |                            |                               |                                                                                                                                                                                                        |
|------|----|----------------------------|-------------------------------|--------------------------------------------------------------------------------------------------------------------------------------------------------------------------------------------------------|
| 64   | 67 | Kim Sunyoung<br>2018       | Nomogram                      | Age, ECOG performance score, differentiation, liver metastasis, lung metastasis, peritoneal metastasis, bone metastasis, gastrectomy, WBC, platelet, albumin, bilirubin, ALP                           |
| 65   | 67 | Kim Sunyoung<br>2018       | Nomogram                      | Age, ECOG performance score, differentiation, liver metastasis, lung metastasis, peritoneal metastasis, bone metastasis, gastrectomy, WBC, platelet, albumin, bilirubin, ALP, response to chemotherapy |
| 66   | 68 | Kangi Azam<br>Korhani 2017 | Artificial Neural<br>Network  | Time of diagnosis, age, sex, smoking, addiction to opium, residency, family history, morphology, surgery, chemotherapy, radiotherapy, metastasis, histological grade, TNM                              |
| 67   | 68 | Kangi Azam<br>Korhani 2017 | Bayesian Neural<br>Network    | Time of diagnosis, age, sex, smoking, addiction to opium, residency, family history, morphology, surgery, chemotherapy, radiotherapy, metastasis, histological grade, TNM                              |
| 68   | 69 | Lin C 2017                 | Nomogram                      | T, N, Tryptase                                                                                                                                                                                         |
| 69   | 70 | Lin Chao 2016              | Nomogram                      | T, N, M, IL-13Ra2                                                                                                                                                                                      |
| 70   | 71 | Liu Hao 2017               | Nomogram                      | T, N, GM-CSF, adjuvant chemotherapy                                                                                                                                                                    |
| 71   | 72 | Miao Yan 2017              | Equation, Score               | LINC01018, LOC553137, MIR4435-2HG, TTTY14                                                                                                                                                              |
| 72   | 73 | Narita Yukiya<br>2017      | Nomogram                      | ECOG performance score, previous gastrectomy, HER2, ALP, LDH                                                                                                                                           |
| 73   | 74 | Peng Peike 2016            | Nomogram                      | T,N,M, calpain-4                                                                                                                                                                                       |
| 74   | 75 | Peng Pailan<br>2017        | Coefficient-weighted<br>score | ACOT7, CES1, IPMK, NES, PBX3, TMEM245, MIR6756, RAB11FIP4, RBPMS2, RPS27L, TPMT, TNFRSF11A                                                                                                             |

|    |    |                     |                            |                                                                                                               |
|----|----|---------------------|----------------------------|---------------------------------------------------------------------------------------------------------------|
| 75 | 76 | Qu Jinglei 2017     | HR-weighted score          | Age, T, NLR                                                                                                   |
| 76 | 77 | Song Jianning 2017  | Coefficient-weighted score | MiR-106, miR-15a, miR-93, miR-664                                                                             |
| 77 | 78 | Sun Huiling 2017    | Nomogram                   | T, N, M, surgery type, TBIL,albumin,                                                                          |
| 78 | 80 | Wang Chenghu 2018   | No information             | TNM, TRIM29                                                                                                   |
| 79 | 81 | Wang Pengliang 2017 | Nomogram                   | Sex, age at operation, site, macroscopic type, LV invasion, T, number of metastasis LN, number of examined LN |
| 80 | 83 | Wang Zixian 2017    | Nomogram                   | Age, year of diagnosis, race, site, size, differentiation, T, MLN, NLN                                        |
| 81 | 83 | Wang Zixian 2017    | Nomogram                   | Age, year of diagnosis, race, site, size, differentiation, T, LNR                                             |
| 82 | 83 | Wang Zixian 2017    | Nomogram                   | Age, year of diagnosis, race, site, size, differentiation, T, LODDS                                           |
| 83 | 84 | Wen Ti 2017         | HR-weighted score          | Lauren type, TNM, TC PD-L1, IC PD-L1, IC PD-1, CD8                                                            |
| 84 | 86 | Wu Songyang 2016    | Nomogram                   | T, N, galectin-8                                                                                              |
| 85 | 87 | Yang Junchi 2018    | Coefficient-weighted score | 10-gene score, N, TNM, mutL homolog mutation, recurrence                                                      |
| 86 | 88 | Yuan Shuqian 2017   | Nomogram                   | Age, race, site, differentiation, T, LNR:ART                                                                  |

|     |    |                       |                               |                                                                                                                                                                                               |
|-----|----|-----------------------|-------------------------------|-----------------------------------------------------------------------------------------------------------------------------------------------------------------------------------------------|
| 87  | 88 | Yuan Shuqian<br>2017  | Nomogram                      | Age, race, site, differentiation, T, LNR:ART                                                                                                                                                  |
| 88  | 89 | Zeng D 2018           | Nomogram                      | Immunoscore, TNM, age, Lauren type                                                                                                                                                            |
| 89  | 90 | Zhang Heng<br>2018    | No information                | TNM, CD66b                                                                                                                                                                                    |
| 90  | 91 | Zhang Jing 2017       | Nomogram                      | Age, TNM, chemotherapy, differentiation, tumor size, CEA                                                                                                                                      |
| 91  | 91 | Zhang Jing 2017       | Nomogram                      | TNM, chemotherapy, differentiation, tumor size, CEA, FPR                                                                                                                                      |
| 92  | 92 | Zhao Linyong<br>2016  | Nomogram                      | Age, tumor size, LN counts, LV invasion, T                                                                                                                                                    |
| 93  | 93 | Zheng Zhifang<br>2017 | Coefficient-weighted<br>score | Sacropania, T, N,                                                                                                                                                                             |
| 94  | 94 | Zhong Qing<br>2018    | Nomogram                      | Sex, race, age, depth of invasion, metastasis LN, tumor size, tumor site, grade                                                                                                               |
| 95  | 95 | Zhou Yixin 2018       | Nomogram                      | T, tumor site, number of positive LN, number of negative LN                                                                                                                                   |
| 96  | 95 | Zhou Yixin 2018       | Nomogram                      | T, tumor site, LNR                                                                                                                                                                            |
| 97  | 95 | Zhou Yixin 2018       | Nomogram                      | T, tumor site, LODDS                                                                                                                                                                          |
| 98  | 96 | Oh Sung Eun<br>2018   | Artificial Neural<br>Network  | Age, sex, extent of resection, site, size, resection margin, histologic type, Lauren type, T, N, M, TNM, lymphatic invasion, venous invasion, perineural invasion, postoperative chemotherapy |
| 99  | 97 | Coimbra FJF 2016      | Unweighted score              | Age, extent of resection, chemotherapy                                                                                                                                                        |
| 100 | 98 | Hsieh Mengche<br>2016 | Coefficient-weighted<br>score | Peritoneal metastasis, NLR, mGPS, PG-SGA                                                                                                                                                      |

101

99

Liu Jianjun 2016 Nomogram

Age, site, pathological type, depth of invasion, mLNR, NLR, CAR

\*: The reference # is the same as those in the Online Resource 1.

Supplementary file 3. Quality assessment of model development and validation

|                          |    |                      | Risk of bias |            |                 |             |          |          |
|--------------------------|----|----------------------|--------------|------------|-----------------|-------------|----------|----------|
|                          |    |                      |              |            |                 | Sample size |          |          |
| Model Reference          |    |                      | Participant  |            | and participant |             | Overall  |          |
| #*                       | #* | Study ID             | selection    | Predictors | Outcome         | flow        | Analysis | Judgment |
| <b>Model development</b> |    |                      |              |            |                 |             |          |          |
| 1                        | 1  | Hao Liu 2016         | high         | low        | low             | unclear     | high     | high     |
| 2                        | 2  | Wang Wei 2016        | high         | low        | low             | unclear     | high     | high     |
| 3                        | 2  | Wang Wei 2016        | high         | low        | low             | unclear     | high     | high     |
| 4                        | 3  | Rades Dirk 2015      | high         | low        | low             | high        | high     | high     |
| 5                        | 4  | Wang Xuefei 2012     | low          | low        | low             | unclear     | low      | unclear  |
| 6                        | 4  | Wang Xuefei 2012     | low          | low        | low             | unclear     | low      | unclear  |
| 7                        | 5  | Bria E 2013          | high         | low        | low             | unclear     | low      | high     |
| 8                        | 6  | Zhu Xiaodong 2015    | high         | low        | low             | high        | high     | high     |
| 9                        | 7  | Mohri Yasuhiko 2010  | high         | low        | low             | high        | high     | high     |
| 10                       | 8  | Woo Yanghee 2016     | low          | low        | low             | unclear     | low      | unclear  |
| 11                       | 9  | Victorzon M 1996     | high         | low        | low             | unclear     | high     | high     |
| 12                       | 10 | Costa Marcelo 2006   | high         | low        | low             | high        | high     | high     |
| 13                       | 11 | Haga Yoshio 2015     | low          | low        | low             | unclear     | unclear  | unclear  |
| 14                       | 12 | Catalano V 2008      | high         | low        | low             | unclear     | high     | high     |
| 15                       | 13 | Park Hyung Soon 2011 | high         | low        | low             | high        | high     | high     |
| 16                       | 14 | Wang Qing 2014       | high         | low        | low             | unclear     | high     | high     |
| 17                       | 15 | Kanagavel D 2010     | high         | low        | low             | unclear     | high     | high     |
| 18                       | 16 | Wang Xuefei 2014     | high         | low        | low             | unclear     | high     | high     |
| 19                       | 17 | Han Dongseok 2012    | high         | low        | low             | high        | high     | high     |
| 20                       | 18 | Song Bongil 2015     | high         | low        | low             | high        | high     | high     |
| 21                       | 19 | Xu Zhenyue 2010      | high         | high       | low             | high        | high     | high     |
| 22                       | 20 | Zhang Heng 2015      | high         | low        | low             | high        | low      | high     |
| 23                       | 21 | Wang Zhenglin 2015   | high         | low        | low             | unclear     | high     | high     |
| 24                       | 22 | Mohammadzadeh F 2015 | high         | low        | low             | high        | high     | high     |
| 25                       | 23 | Min Lingqiang 2015   | high         | low        | low             | high        | high     | high     |
| 26                       | 24 | Koo Dong Hoe 2011    | low          | low        | low             | unclear     | high     | high     |
| 27                       | 25 | Zhang H 2014         | high         | low        | low             | high        | high     | high     |
| 28                       | 26 | Liu Kai 2015         | high         | low        | low             | high        | high     | high     |
| 29                       | 28 | Eom Bang Wool 2015   | high         | unclear    | low             | high        | high     | high     |
| 30                       | 29 | Qian Jing 2016       | high         | low        | low             | high        | low      | high     |
| 31                       | 30 | Qu Jinglei 2015      | high         | low        | low             | high        | high     | high     |

|    |    |                         |      |         |     |         |      |      |
|----|----|-------------------------|------|---------|-----|---------|------|------|
| 32 | 31 | Xu Ye qiong 2016        | high | low     | low | unclear | high | high |
| 33 | 32 | Kim Jong Gwang 2008     | high | low     | low | high    | high | high |
| 34 | 33 | Kologlu Murat 2000      | low  | unclear | low | high    | high | high |
| 35 | 34 | Du Chunyan 2011         | high | low     | low | high    | high | high |
| 36 | 35 | Becker Karen 2012       | high | high    | low | unclear | high | high |
| 37 | 36 | Lee J 2007              | high | low     | low | high    | high | high |
| 38 | 37 | Wang Jin 2016           | high | low     | low | high    | high | high |
| 39 | 38 | Lei Ke Feng 2012        | high | high    | low | high    | high | high |
| 40 | 39 | Kadowaki Shigenori 2014 | high | low     | low | unclear | high | high |
| 41 | 40 | Hirabayashi S 2014      | high | low     | low | high    | high | high |
| 42 | 41 | Takahari Daisuke 2014   | low  | low     | low | low     | high | high |
| 43 | 42 | Liu Hao 2015            | high | low     | low | unclear | high | high |
| 44 | 43 | Song Kyo Young 2014     | high | low     | low | high    | high | high |
| 45 | 45 | Wang Zixian 2016        | low  | low     | low | unclear | high | high |
| 46 | 46 | Liu Hao 2016            | high | low     | low | unclear | high | high |
| 47 | 47 | Marubini E 1993         | low  | low     | low | unclear | high | high |
| 48 | 48 | Wang Zhiqiang 2017      | high | high    | low | high    | high | high |
| 49 | 49 | Wang Pin 2016           | high | high    | low | high    | high | high |
| 50 | 51 | Bauer L 2018            | high | low     | low | high    | high | high |
| 51 | 53 | Cao Yifan 2017          | high | low     | low | unclear | high | high |
| 52 | 54 | Cao Yi fan 2016         | high | low     | low | unclear | high | high |
| 53 | 55 | Chen Hao 2017           | high | low     | low | unclear | high | high |
| 54 | 56 | Chen Shangxiang 2017    | high | low     | low | unclear | high | high |
| 55 | 57 | Choi Jongho 2018        | high | low     | low | unclear | low  | high |
| 56 | 58 | De Brian 2018           | high | low     | low | high    | high | high |
| 57 | 59 | Deng Xiaorong 2017      | high | high    | low | unclear | high | high |
| 58 | 60 | Fuchs Charles S 2017    | low  | low     | low | high    | high | high |
| 59 | 61 | Goshayeshi Laden 2017   | high | high    | low | high    | high | high |
| 60 | 63 | Hou Junyi 2016          | high | high    | low | high    | high | high |
| 61 | 64 | Hung Yushin 2017        | high | low     | low | unclear | low  | high |
| 62 | 65 | Jiang Yuming 2018       | high | low     | low | unclear | low  | high |
| 63 | 65 | Jiang Yuming 2018       | high | low     | low | unclear | low  | high |
| 64 | 67 | Kim Sunyoung 2018       | high | low     | low | unclear | high | high |
| 65 | 67 | Kim Sunyoung 2018       | high | low     | low | unclear | high | high |
| 66 | 68 | Kangi Azam Korhani 2017 | high | low     | low | unclear | high | high |

|     |    |                         |      |      |     |         |      |      |
|-----|----|-------------------------|------|------|-----|---------|------|------|
| 67  | 68 | Kangi Azam Korhani 2018 | high | low  | low | unclear | high | high |
| 68  | 69 | Lin C 2017              | high | high | low | unclear | high | high |
| 69  | 70 | Lin Chao 2016           | high | high | low | unclear | high | high |
| 70  | 71 | Liu Hao 2017            | high | high | low | unclear | high | high |
| 71  | 72 | Miao Yan 2017           | high | high | low | unclear | high | high |
| 72  | 73 | Narita Yukiya 2017      | high | low  | low | low     | high | high |
| 73  | 74 | Peng Peike 2016         | high | high | low | unclear | high | high |
| 74  | 75 | Peng Pailan 2017        | high | high | low | high    | low  | high |
| 75  | 76 | Qu Jinglei 2017         | high | low  | low | unclear | high | high |
| 76  | 77 | Song Jianning 2017      | high | high | low | high    | high | high |
| 77  | 78 | Sun Huiling 2017        | high | high | low | unclear | high | high |
| 78  | 80 | Wang Chenghu 2018       | high | high | low | unclear | high | high |
| 79  | 81 | Wang Pengliang 2017     | high | low  | low | high    | high | high |
| 80  | 83 | Wang Zixian 2017        | high | low  | low | low     | high | high |
| 81  | 83 | Wang Zixian 2017        | high | low  | low | low     | high | high |
| 82  | 83 | Wang Zixian 2017        | high | low  | low | low     | high | high |
| 83  | 84 | Wen Ti 2017             | high | high | low | high    | high | high |
| 84  | 86 | Wu Songyang 2016        | high | high | low | high    | high | high |
| 85  | 87 | Yang Junchi 2018        | high | high | low | high    | high | high |
| 86  | 88 | Yuan Shuqian 2017       | high | low  | low | low     | low  | high |
| 87  | 88 | Yuan Shuqian 2017       | high | low  | low | low     | low  | high |
| 88  | 89 | Zeng D 2018             | high | low  | low | high    | low  | high |
| 89  | 90 | Zhang Heng 2018         | high | high | low | unclear | high | high |
| 90  | 91 | Zhang Jing 2017         | high | low  | low | high    | high | high |
| 91  | 91 | Zhang Jing 2017         | high | low  | low | high    | high | high |
| 92  | 92 | Zhao Linyong 2016       | high | low  | low | unclear | high | high |
| 93  | 93 | Zheng Zhifang 2017      | high | low  | low | high    | high | high |
| 94  | 94 | Zhong Qing 2018         | high | low  | low | unclear | high | high |
| 95  | 95 | Zhou Yixin 2018         | high | low  | low | high    | low  | high |
| 96  | 95 | Zhou Yixin 2018         | high | low  | low | high    | low  | high |
| 97  | 95 | Zhou Yixin 2018         | high | low  | low | high    | low  | high |
| 98  | 96 | Oh Sung Eun 2018        | high | low  | low | unclear | high | high |
| 99  | 97 | Coimbra FJF 2016        | high | high | low | high    | high | high |
| 100 | 98 | Hsieh Mengche 2016      | high | low  | low | high    | high | high |
| 101 | 99 | Liu Jianjun 2016        | high | low  | low | unclear | high | high |

#### External validation

|   |   |                  |      |     |     |      |         |      |
|---|---|------------------|------|-----|-----|------|---------|------|
| 5 | 4 | Wang Xuefei 2012 | high | low | low | high | unclear | high |
|---|---|------------------|------|-----|-----|------|---------|------|

|    |    |                       |      |     |     |         |         |      |
|----|----|-----------------------|------|-----|-----|---------|---------|------|
| 6  | 4  | Wang Xuefei 2012      | high | low | low | high    | unclear | high |
| 10 | 8  | Woo Yanghee 2016      | high | low | low | unclear | low     | high |
| 10 | 8  | Woo Yanghee 2016      | high | low | low | unclear | low     | high |
| 10 | 8  | Woo Yanghee 2016      | high | low | low | unclear | low     | high |
| 10 | 8  | Woo Yanghee 2016      | high | low | low | unclear | low     | high |
| 10 | 50 | Akgul O 2018          | high | low | low | high    | low     | high |
| 10 | 85 | Woo Yanghee 2017      | high | low | low | low     | unclear | high |
| 13 | 62 | Haga Yoshio 2018      | high | low | low | low     | high    | high |
| 19 | 17 | Han Dongseok 2012     | high | low | low | high    | high    | high |
| 19 | 52 | Bencivenge M 2017     | high | low | low | low     | high    | high |
| 19 | 52 | Bencivenge M 2017     | high | low | low | low     | low     | high |
| 19 | 66 | Kim Pyeongsu 2017     | high | low | low | low     | high    | high |
| 19 | 82 | Wang ZX 2017          | high | low | low | low     | unclear | high |
| 27 | 25 | Zhang H 2014          | high | low | low | high    | high    | high |
| 29 | 27 | Reim Daniel 2015      | high | low | low | low     | low     | high |
| 29 | 28 | Eom Bang Wool 2015    | high | low | low | low     | unclear | high |
| 42 | 79 | Daisuke Takahari 2017 | high | low | low | low     | high    | high |
| 47 | 44 | Mariani Luigi 2005    | high | low | low | high    | high    | high |
| 47 | 47 | Marubini E 1993       | low  | low | low | unclear | high    | high |
| 48 | 48 | Wang Zhiqiang 2017    | high | low | low | low     | high    | high |
| 54 | 56 | Chen Shangxiang 2017  | high | low | low | low     | low     | high |
| 54 | 56 | Chen Shangxiang 2017  | high | low | low | low     | low     | high |
| 60 | 63 | Hou Junyi 2016        | high | low | low | unclear | unclear | high |
| 72 | 73 | Narita Yukiya 2017    | high | low | low | low     | unclear | high |
| 74 | 75 | Peng Pailan 2017      | high | low | low | unclear | unclear | high |
| 80 | 83 | Wang Zixian 2017      | high | low | low | low     | high    | high |
| 81 | 83 | Wang Zixian 2017      | high | low | low | low     | high    | high |
| 82 | 83 | Wang Zixian 2017      | high | low | low | low     | high    | high |
| 85 | 87 | Yang Junchi 2018      | high | low | low | unclear | unclear | high |
| 89 | 90 | Zhang Heng 2018       | high | low | low | unclear | unclear | high |
| 94 | 94 | Zhong Qing 2018       | high | low | low | unclear | high    | high |

\*: The model # and reference # are the same as those in the Online Resource 1.
